# Supplementary material for: California earthquake insurance unpopularity: the issue is the price, not the risk perception
Source: Copernicus journal article supplement (doi:10.5194/nhess-19-1909-2019), 2019-08-29
Supplement: Supplementary file 1 [file nhess-19-1909-2019-supplement.zip]

Archive with 3 entries (3 files):
- POTHON_et_al_2019_ESUPP.csv
- POTHON_et_al_2019_ESUPP.docx
- nhess-19-1909-2019-supplement-title-page.pdf
