# Supplementary material for: California earthquake insurance unpopularity: the issue is the price, not the risk perception
Source: Copernicus journal article supplement (doi:10.5194/nhess-19-1909-2019), 2019-08-29
Supplement: Supplementary file 1 [file nhess-19-1909-2019-supplement.zip › nhess-19-1909-2019-supplement-title-page.pdf]

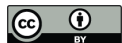

## *Supplement of*

# **California earthquake insurance unpopularity: the issue is the price, not the risk perception**

**Adrien Pothon et al.**

*Correspondence to:* Adrien Pothon ([adrien.pothon@univ-grenoble-alpes.fr](mailto:adrien.pothon@univ-grenoble-alpes.fr))

- [nhess-19-1909-2019-supplement-title-page.pdf](#)
- [POTHON\\_et\\_al\\_2019\\_ESUPP.csv](#)
- [POTHON\\_et\\_al\\_2019\\_ESUPP.docx](#)

The copyright of individual parts of the supplement might differ from the CC BY 4.0 License.
