# Supplementary material for: California earthquake insurance unpopularity: the issue is the price, not the risk perception
Source: Copernicus journal article supplement (doi:10.5194/nhess-19-1909-2019), 2019-08-29
Supplement: Supplementary file 1 [file nhess-19-1909-2019-supplement.zip › POTHON_et_al_2019_ESUPP.csv]

Year	Total premium (,000) - EQ (E.)	Total premium (,000) - EQ (W.)	Total premium (,000) - Res (W.)	Total premium (,000) - Ho (W.)	Average premium - Ho($)	Average premium - Ho(%)	Average premium - Res ($)	Average premium - Res (%)	Average premium - Variation since (year)	Take-up rate - Res	Take-up rate - Ho	Take-up rate - Variation since (year)	Number of policies - Ho	Number of policies - Res	Average sum insured (,000)	Real Building Cost Index	CPI	Pop. (,000)
1921	14	-	-	-	-	-	-	-	-	-	-	-	-	-	-	32.8	17	3,795
1922	48	-	-	-	-	-	-	-	-	-	-	-	-	-	-	34.4	16	3,991
1923	214	-	-	-	-	-	-	-	-	-	-	-	-	-	-	41.6	17	4,270
1924	291	-	-	-	-	-	-	-	-	-	-	-	-	-	-	40.4	17	4,541
1925	1,944	-	-	-	-	-	-	-	-	-	-	-	-	-	-	39.7	17	4,730
1926	2,528	-	-	-	-	-	-	1.39%	-	4.50%	-	-	-	-	-	38.8	16	4,929
1927	2,903	-	-	-	-	-	-	1.73%	-	4%	-	-	-	-	-	39.9	16	5,147
1928	1,963	-	-	-	-	-	-	0.90%	-	5.40%	-	-	-	-	-	40.8	16	5,344
1929	1,968	-	-	-	-	-	-	0.65%	-	6.70%	-	-	-	-	-	41.9	16	5,531
1930	2,000	-	-	-	-	-	-	0.59%	-	7.80%	-	-	-	-	-	40.6	16	5,711
1931	2,000	-	-	-	-	-	-	-	-	-	-	-	-	-	-	39.7	14	5,824
1932	700	-	-	-	-	-	-	-	-	-	-	-	-	-	-	34.4	13	5,894
1933	900	-	-	-	-	-	-	-	-	-	-	-	-	-	-	43.1	12	5,963
1934	1,000	-	-	-	-	-	-	-	-	-	-	-	-	-	-	47.5	13	6,060
1935	900	-	-	-	-	-	-	-	-	-	-	-	-	-	-	45.8	13	6,175
1936	900	-	-	-	-	-	-	-	-	-	-	-	-	-	-	46.8	13	6,341
1937	900	-	-	-	-	-	-	-	-	-	-	-	-	-	-	52.2	14	6,528
1938	800	-	-	-	-	-	-	-	-	-	-	-	-	-	-	52.1	13	6,656
1939	900	-	-	-	-	-	-	-	-	-	-	-	-	-	-	52.8	13	6,785
1940	1,000	-	-	-	-	-	-	-	-	-	-	-	-	-	-	54.8	13	6,950
1941	1,100	-	-	-	-	-	-	-	-	-	-	-	-	-	-	56.2	14	7,237
1942	1,200	-	-	-	-	-	-	-	-	-	-	-	-	-	-	53.1	16	7,735
1943	1,400	-	-	-	-	-	-	-	-	-	-	-	-	-	-	50.9	17	8,506
1944	1,700	-	-	-	-	-	-	-	-	-	-	-	-	-	-	50.7	17	8,945
1945	1,400	-	-	-	-	-	-	-	-	-	-	-	-	-	-	50.4	17	9,344
1946	2,400	-	-	-	-	-	-	-	-	-	-	-	-	-	-	54.1	19	9,559
1947	2,800	-	-	-	-	-	-	-	-	-	-	-	-	-	-	54.7	21	9,832
1948	2,700	-	-	-	-	-	-	-	-	-	-	-	-	-	-	54	23	10,064
1949	3,400	-	-	-	-	-	-	-	-	-	-	-	-	-	-	55.1	23	10,337
1950	3,300	-	-	-	-	-	-	-	-	-	-	-	-	-	-	59.9	23	10,677
1951	3,400	-	-	-	-	-	-	-	-	-	-	-	-	-	-	59.3	25	11,134
1952	3,900	-	-	-	-	-	-	-	-	-	-	-	-	-	-	58.9	26	11,635
1953	4,300	-	-	-	-	-	-	-	-	-	-	-	-	-	-	60.8	26	12,251
1954	3,800	-	-	-	-	-	-	-	-	-	-	-	-	-	-	62.3	26	12,746
1955	4,100	-	-	-	-	-	-	-	-	-	-	-	-	-	-	66	26	13,133
1956	4,300	-	-	-	-	-	-	0.50%	-	< 5%	-	-	-	-	-	68.8	26	13,713
1957	5,200	-	-	-	-	-	-	-	-	-	-	-	-	-	-	69.2	27	14,264
1958	5,500	-	-	-	-	-	-	-	-	-	-	-	-	-	-	68.9	28	14,880
1959	5,300	-	-	-	-	-	-	-	-	-	-	-	-	-	-	71	29	15,467
1960	5,500	-	-	-	-	-	-	-	-	-	-	-	-	-	-	71.6	29	15,870
1961	5,700	-	-	-	-	-	-	-	-	-	-	-	-	-	-	71.6	30	16,497
1962	5,000	-	-	-	-	-	-	-	-	-	-	-	-	-	-	72.6	30	17,072
1963	6,200	-	-	-	-	-	-	-	-	-	-	-	-	-	-	73.4	30	17,668
1964	4,900	-	-	-	-	-	-	-	-	-	-	-	-	-	-	74.4	31	18,151
1965	4,900	-	-	-	-	-	-	-	-	-	-	-	-	-	-	75.5	32	18,858
1966	5,300	-	-	-	-	-	-	-	-	-	-	-	-	-	-	76.7	32	19,176
1967	5,300	-	-	-	-	-	-	-	-	-	-	-	-	-	-	77.2	33	19,394
1968	5,200	-	-	-	-	-	-	-	-	-	-	-	-	-	-	79.4	35	19,711
1969	5,800	-	-	-	-	-	-	-	-	-	-	-	-	-	-	83.3	36	19,953
1970	5,873	-	-	-	-	-	-	-	-	-	-	-	-	-	-	83	38	19,971
1971	4,618	-	-	-	-	-	-	-	-	7.50%	-	-	-	-	-	89.4	40	20,346
1972	8,954	-	-	-	-	0.23%	-	-	-	-	1.50%	-	-	-	-	95.7	41	20,585
1973	10,897	-	-	-	-	-	-	-	-	-	-	-	-	-	-	100.3	43	20,869
1974	12,966	-	-	-	-	-	-	-	-	-	-	-	-	-	-	97.1	48	21,174
1975	13,842	-	-	-	-	-	-	-	-	-	-	-	-	-	-	94.1	53	21,538
1976	17,130	-	-	-	-	-	120	-	-	< 5%	-	-	-	-	-	96.2	56	21,936
1977	19,760	-	-	-	-	-	120	-	-	-	-	-	-	-	-	99.2	60	22,352
1978	23,159	-	-	-	-	-	120	-	-	7%	-	-	-	-	-	100.6	65	22,836
1979	28,523	-	-	-	-	-	-	-	-	-	-	-	-	-	-	100	71	23,257
1980	38,287	-	-	-	-	-	-	-	-	-	-	-	-	-	-	93.7	82	23,668
1981	50,58	-	-	-	-	-	-	-	-	-	-	-	-	-	-	90.5	91	24,286
1982	58,436	-	-	-	-	-	-	-	-	-	-	-	-	-	-	89	97	24,820
1983	71,487	-	-	-	-	-	-	-	-	-	-	-	-	-	-	91.5	99	25,360
1984	79,808	-	-	-	-	-	-	-	-	-	-	-	-	-	-	89.1	104	25,844
1985	135,546	-	-	-	-	-	-	-	-	-	-	-	-	-	-	86.3	108	26,441
1986	180,421	-	-	-	-	-	-	-	-	-	-	-	-	-	-	85.1	112	27,102
1987	209,265	-	-	-	-	-	-	-	-	-	-	-	-	-	-	85.8	116	27,777
1988	278,755	-	-	-	-	-	-	-	-	-	-	-	-	-	-	84.3	121	28,464
1989	335,222	-	-	-	-	-	-	-	-	-	22%	-	-	-	-	81.7	127	29,218
1990	384,596	-	-	-	-	-	-	-	-	-	24.60%	-	1219461	-	-	79.6	134	29,760
1991	425,643	-	-	-	-	0.15%	-	-	-	-	-	+11% (1989)	-	-	-	76.7	140	30,471
1992	481,402	518,572	-	-	-	-	36	-	-	-	100%	-	-	-	-	77.1	145	30,975
1993	526,538	549,712	-	-	-	-	-	-	-	-	37%	-	-	-	-	78.9	148	31,275
1994	622,871	668,46	-	-	-	-	-	-	-	-	30.60%	-	1931449	-	-	79.9	151	31,484
1995	740,270	882,989	-	-	-	-	-	-	+65% (1994)	20%	-	-	-	-	-	77.7	153	31,697
1996	935,687	950,813	778,7	660,875	377	-	326	-	-	31.40%	33.20%	-	-	7,600,348	-	77.9	156	32,019
1997	859,300	814,413	606,430	536,427	479	-	394	-	-	19.50%	20.90%	-	-	7,888,439	-	79.4	160	32,486
1998	782,597	768,439	588,724	516,795	528	-	429	-	-	17.40%	18%	-	-	7,863,075	-	78.8	164	32,988
1999	781,16	798,377	625,837	544,575	553	-	459	-	-	16.80%	17.50%	-	-	8,117,239	-	79	169	33,499
2000	826,194	822,151	637,262	562,481	594	-	497	-	-	15.70%	16.50%	-	-	8,164,975	-	78.7	176	33,872
2001	883,639	937,640	661,267	585,30	621	-	514	-	-	15.80%	16.50%	-	-	8,117,496	-	76.6	184	34,479
2002	912,234	930,529	661,366	581,92	662	-	546	-	-	14.60%	15%	-	-	8,284,627	-	76.8	188	34,872
2003	917,806	916,864	660,798	584,812	709	-	580	-	-	13.30%	13.60%	-	-	8,546,498	-	76.3	192	35,253
2004	948,342	970,826	760,796	683,875	771	-	630	-	-	13.80%	14.30%	-	-	8,729,111	-	80.8	196	35,575
2005	976,99	1,024,822	698,621	621,189	820	-	659	-	-	11.90%	11.90%	-	-	8,937,821	-	82.8	202	35,828
2006	1,071,353	1092,64	810,196	731,942	863	-	715	-	-	12.80%	13.70%	-	-	8,844,725	385	82.7	210	36,021
2007	1,100,684	1,117,560	864,548	773,620	883	-	735	-	-	13.10%	14.40%	-	-	9,001,216	412	83.2	217	36,250
2008	1,120,923	1,146,181	931,159	835,241	972	-	803	-	-	12.60%	14.20%	-	-	9,212,237	446	83.4	224	36,604
2009	1,188,182	1,210,119	952,271	850,374	1,003	-	837	-	-	12%	13.90%	-	-	9,489,964	458	84.8	224	36,961
2010	1,202,170	1,217,498	977,600	865,291	1,034	-	848	-	-	11.80%	13.80%	-	-	9,764,340	485	84.6	227	37,677
2011	1,221,541	1,240,187	988,745	872,968	1,070	-	858	-	-	11.30%	13.20%	-	-	10,197,484	542	86.2	233	38,011
2012	1,224,549	1205,44	919,815	806,530	1,042	-	821	-	-	10.60%	12.40%	-	-	10,564,701	556	85.7	238	38,335
2013	1,194,498	1,198,409	896,860	782,725	1,032	-	808	-	-	10.10%	11.90%	-	-	11,015,850	575	86.1	242	38,681
2014	1,229,480	1,259,163	940,192	821,662	1,073	-	824	-	-	10.20%	11.90%	-	-	11,222,202	600	86.5	247	38,994
2015	1,248,721	1253,19	984,472	858,959	1,103	-	855	-	-	10.20%	12.40%	-	-	11,246,982	604	88.5	252	39,250
2016	1,277,961	1,290,176	986,368	870,112	1,004	-	812	-	-	10.80%	14.70%	-	-	11,258,944	613	-	258	39,537
