# Supplementary material for: California earthquake insurance unpopularity: the issue is the price, not the risk perception
Source: Copernicus journal article supplement (doi:10.5194/nhess-19-1909-2019), 2019-08-29
Supplement: Supplementary file 1 [file nhess-19-1909-2019-supplement.zip › POTHON_et_al_2019_ESUPP.docx]

Electronic supplement

The electronic supplement (Table S1) gives the data collected on California earthquake insurance market between 1921 and 2016. They are used to build the model of earthquake insurance take-up rate based on the average premium amount and the relative risk perception. The fields in the Table S1 are the following:

- Total premium amount
  - Earned premium amount / Earthquake line of insurance
  - Written premium amount / Earthquake line of insurance
  - Written premium amount / Homeowners line of business
- Average premium amount
  - Amount / Homeowners line of business
  - Rate / Homeowners line of business
  - Amount / Residential line of business
  - Rate / Residential line of business
  - Rate / Annual variation
- Take-up rate
  - Value / Residential line of business
  - Value / Homeowners line of business
  - Annual variation / Residential line of business
- Number of insurance policies
  - Value / Homeowners line of business
  - Value / Residential line of business
- Average sum insured
  - Value / Homeowners line of business
- Real Building Cost Index
- Consumer Price Index (CPI)
  - Average between the CPI between San Francisco and Los Angeles
- California Population
